# Supplementary material for: Highly efficient blue-green dual-narrow-emission in RbAl11O17:Eu2+,Mn2+ toward wide-color-gamut human-centric backlights
Source: Royal Society of Chemistry journal article supplement (doi:10.1039/d4tc01194e), 2024-01-01
Supplement: d4tc01194e1.pdf [file d4tc01194e1.pdf]

Electronic Supplementary Information

**Highly Efficient Blue-Green Dual-Narrow-Emission in  $\text{RbAl}_{11}\text{O}_{17}:\text{Eu}^{2+}$ ,  $\text{Mn}^{2+}$  toward  
Wide-Color-Gamut Human-Centric Backlights**

Yali Xue, Yujun Liang\*, Weilun Zhang, Xiaodeng Wu, Chuang Han

Engineering Research Center of Nano-Geomaterials of Ministry of Education, Faculty of Materials  
Science and Chemistry, China University of Geosciences, Wuhan 430074, China. E-mail:  
yujunliang@sohu.com

Table S1. Photoluminescence properties of several green-emitting phosphors for backlight display applications.

| Phosphors                                                                    | $\lambda_{em}$ (nm) | FWHM (nm) | $\lambda_{ex}$ (nm) | Thermal behavior | IQE | NTSC | Ref.      |
|------------------------------------------------------------------------------|---------------------|-----------|---------------------|------------------|-----|------|-----------|
| $\beta$ -sialon:Eu <sup>2+</sup>                                             | 540                 | 55        | 405                 | 81% (150 °C)     | 71% | 101% | 13        |
| $\gamma$ -AlON:Mn <sup>2+</sup>                                              | 520                 | 44        | 445                 | 76% (150 °C)     | 62% | 102% | 25        |
| LaZnAl <sub>11</sub> O <sub>19</sub> :Eu <sup>2+</sup> ,<br>Mn <sup>2+</sup> | 515                 | 26        | 350                 | 80% (150 °C)     | 88% | 123% | 23        |
| MgAl <sub>2</sub> O <sub>4</sub> :Mn <sup>2+</sup>                           | 525                 | 35        | 450                 | 92% (150 °C)     | 45% | 116% | 26        |
| Sr <sub>2</sub> MgAl <sub>22</sub> O <sub>36</sub> :Mn <sup>2+</sup>         | 518                 | 26        | 450                 | 80% (150 °C)     | 75% | 127% | 27        |
| BaZnAl <sub>10</sub> O <sub>17</sub> :Mn <sup>2+</sup>                       | 516                 | 31        | 450                 | 88% (150 °C)     | 86% | 110% | 28        |
| CsPbBr <sub>3</sub>                                                          | 523                 | 20        | 450                 | 62% (150 °C)     | 63% | 102% | 55        |
| RbAl <sub>11</sub> O <sub>17</sub> :Eu <sup>2+</sup> , Mn <sup>2+</sup>      | 511                 | 26        | 345                 | 54% (150 °C)     | 63% | 118% | This work |

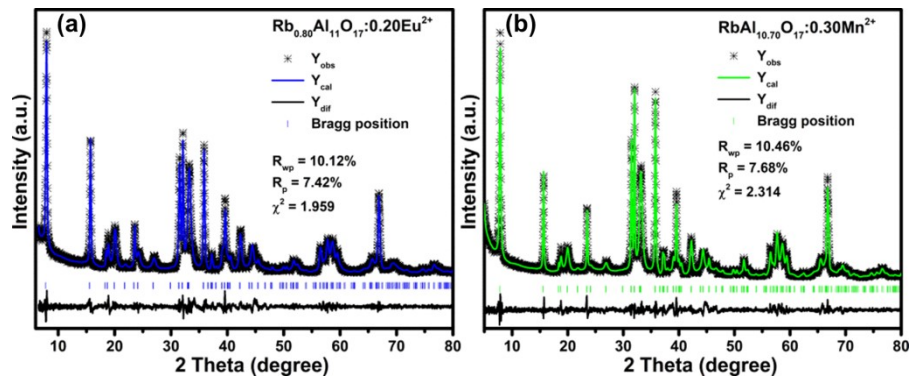

Figure S1 Rietveld refinement patterns of  $\text{Rb}_{0.80}\text{Al}_{11}\text{O}_{17}:\text{0.20Eu}^{2+}$  and  $\text{RbAl}_{10.70}\text{O}_{17}:\text{0.30Mn}^{2+}$  samples.

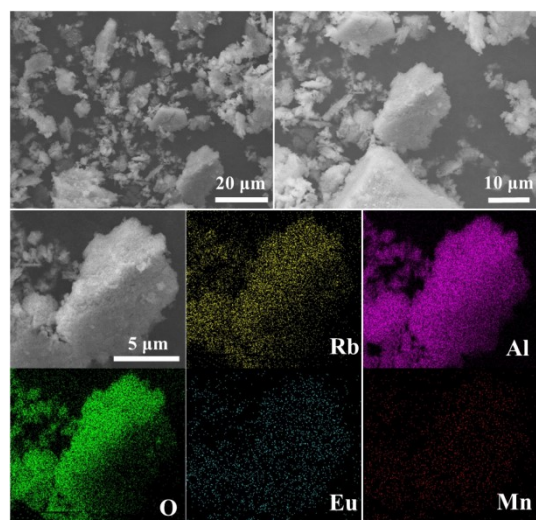

Figure S2 The morphology and elemental distribution of  $\text{Rb}_{0.80}\text{Al}_{10.95}\text{O}_{17}:\text{0.20Eu}^{2+}$ ,  $\text{0.05Mn}^{2+}$ .

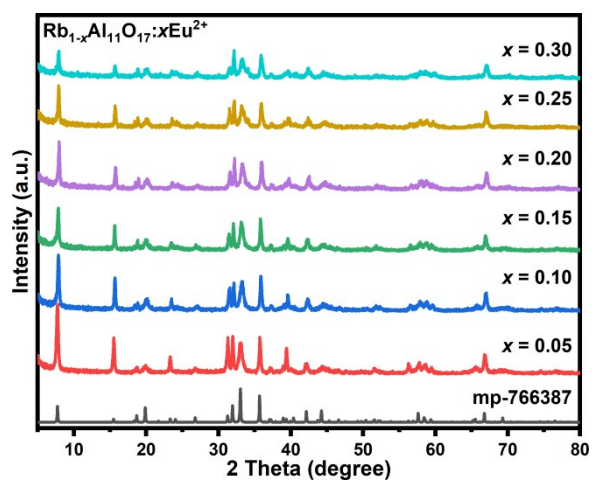

Figure S3 XRD patterns of  $\text{Rb}_{1-x}\text{Al}_{11}\text{O}_{17}:x\text{Eu}^{2+}$  with the standard  $\text{RbAl}_{11}\text{O}_{17}$  data.

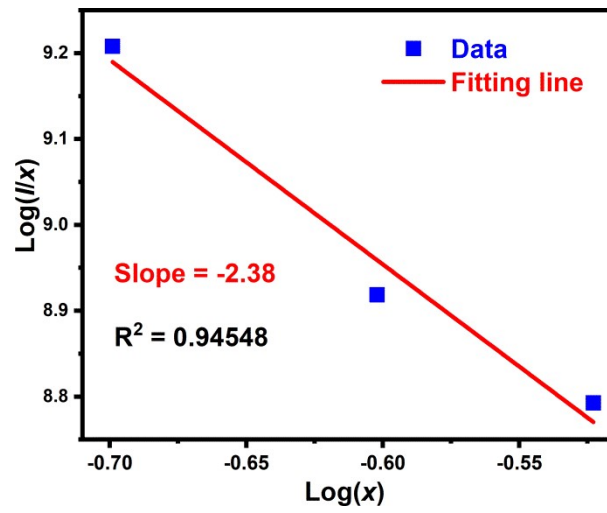

Figure S4 The relationship between  $\lg(I/x)$  and  $\lg(x)$  in  $\text{Rb}_{1-x}\text{Al}_{11}\text{O}_{17}:x\text{Eu}^{2+}$ .

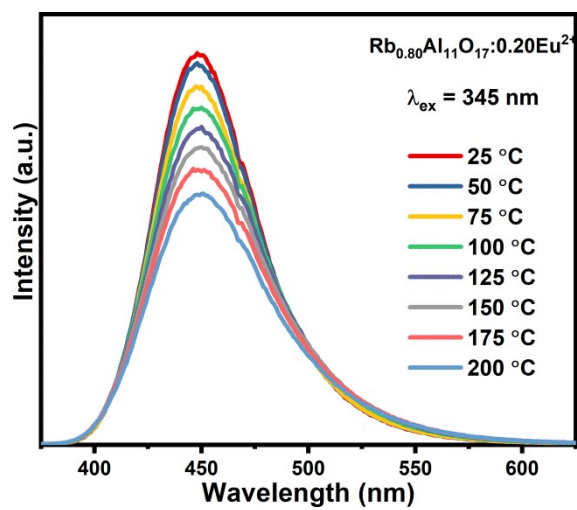

Figure S5 Temperature-dependent emission spectra of  $\text{Rb}_{0.80}\text{Al}_{11}\text{O}_{17}:0.20\text{Eu}^{2+}$ .

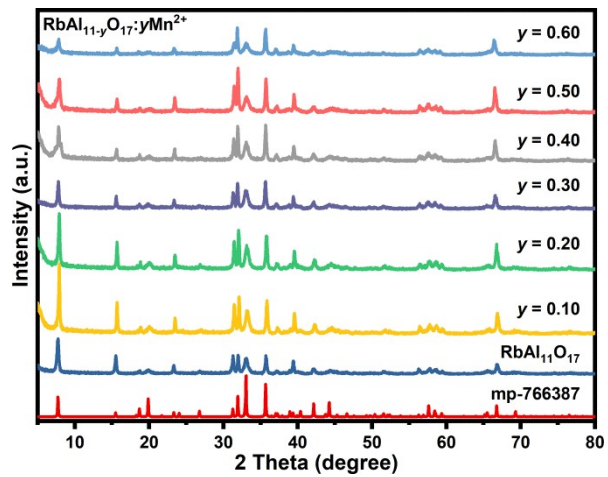

Figure S6 XRD patterns of  $\text{RbAl}_{11-y}\text{O}_{17}:y\text{Mn}^{2+}$  with the standard data.



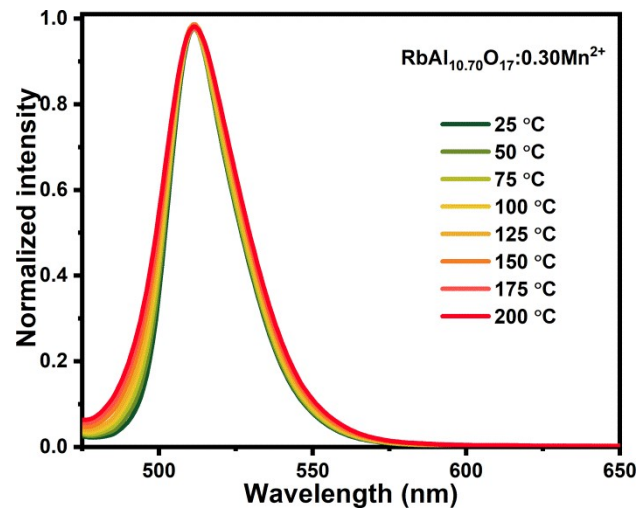

Figure S7 The normalized emission spectra of  $\text{RbAl}_{10.70}\text{O}_{17}:0.30\text{Mn}^{2+}$  at different temperatures.

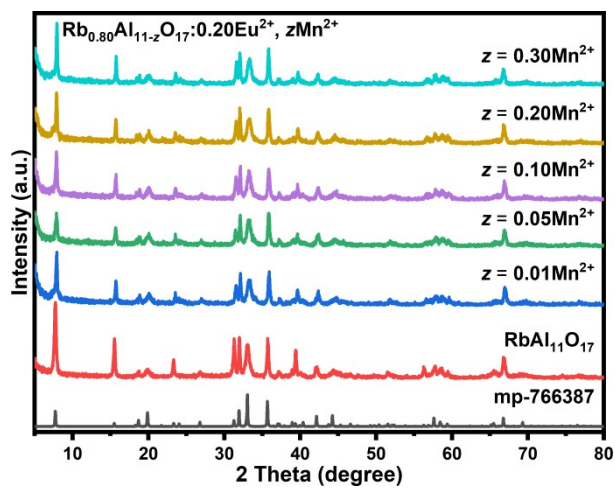

Figure S8 XRD patterns of  $\text{Rb}_{0.80}\text{Al}_{11-z}\text{O}_{17}:0.20\text{Eu}^{2+}, z\text{Mn}^{2+}$  with the standard data.

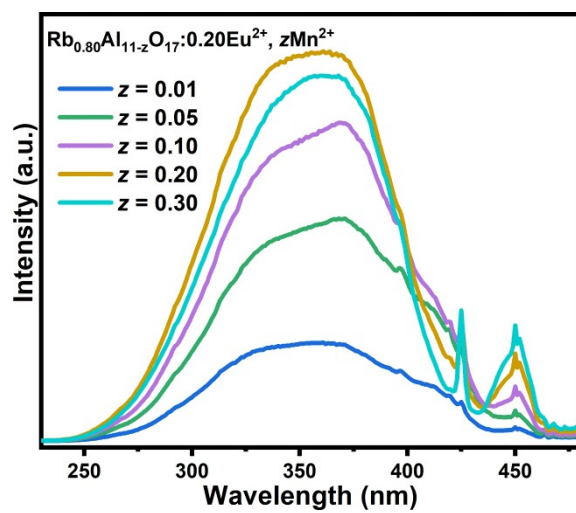

Figure S9 The excitation spectra of  $\text{Rb}_{0.80}\text{Al}_{11-z}\text{O}_{17}:0.20\text{Eu}^{2+}, z\text{Mn}^{2+}$  with 510 nm emission.

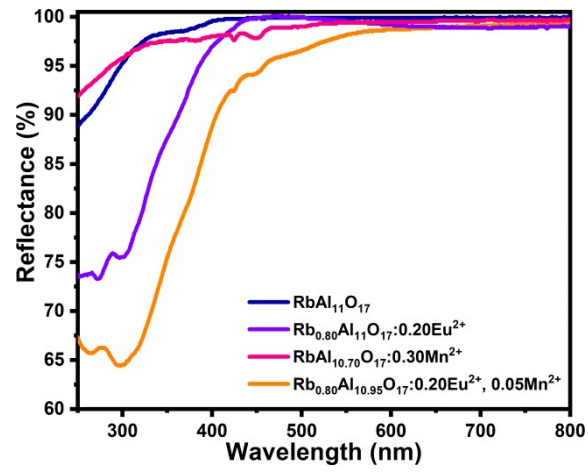

Figure S10 UV-vis diffuse reflectance spectra of the RbAl<sub>11</sub>O<sub>17</sub>, Rb<sub>0.80</sub>Al<sub>11</sub>O<sub>17</sub>:0.20Eu<sup>2+</sup>, RbAl<sub>10.70</sub>O<sub>17</sub>:0.30Mn<sup>2+</sup> and Rb<sub>0.80</sub>Al<sub>10.95</sub>O<sub>17</sub>:0.20Eu<sup>2+</sup>, 0.05Mn<sup>2+</sup> samples.

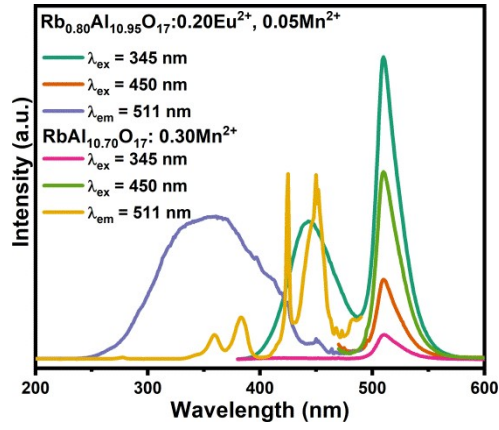

Figure S11 Emission ( $\lambda_{\text{ex}} = 345, 450 \text{ nm}$ ) and excitation ( $\lambda_{\text{em}} = 511 \text{ nm}$ ) spectra of Rb<sub>0.80</sub>Al<sub>10.95</sub>O<sub>17</sub>:0.20Eu<sup>2+</sup>, 0.05Mn<sup>2+</sup> and RbAl<sub>10.70</sub>O<sub>17</sub>:0.30Mn<sup>2+</sup>.

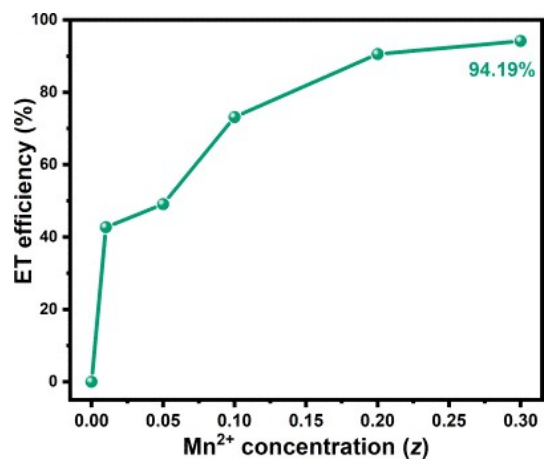

Figure S12 The  $\eta_{ET}$  depending on the  $Mn^{2+}$  doping concentration in  $Rb_{0.80}Al_{11-z}O_{17}:0.20Eu^{2+}, zMn^{2+}$  phosphors.

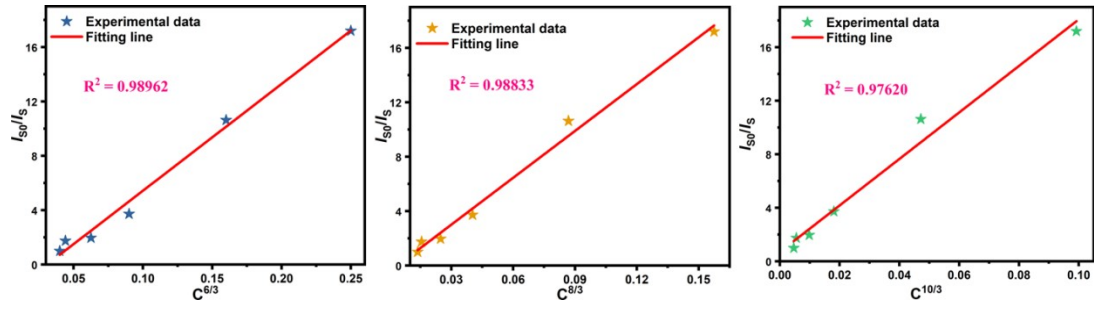

Figure S13 Linear fits of  $I_0/I_s$  and  $C^{n/3}$  at  $n$  values of 6, 8 and 10 in  $\text{Rb}_{0.80}\text{Al}_{10.80}\text{O}_{17}:0.20\text{Eu}^{2+}, 0.2\text{Mn}^{2+}$ .

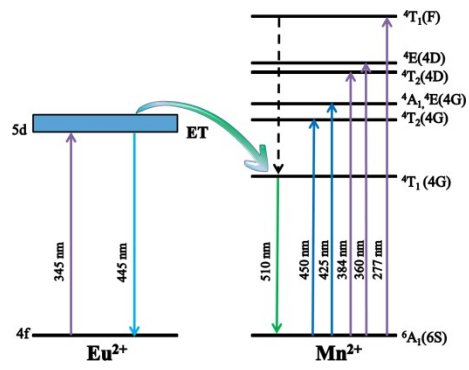

Figure S14 The energy transfer process between  $\text{Eu}^{2+}$  and  $\text{Mn}^{2+}$  in  $\text{RbAl}_{11}\text{O}_{17}:\text{Eu}^{2+}$ ,  $\text{Mn}^{2+}$ .



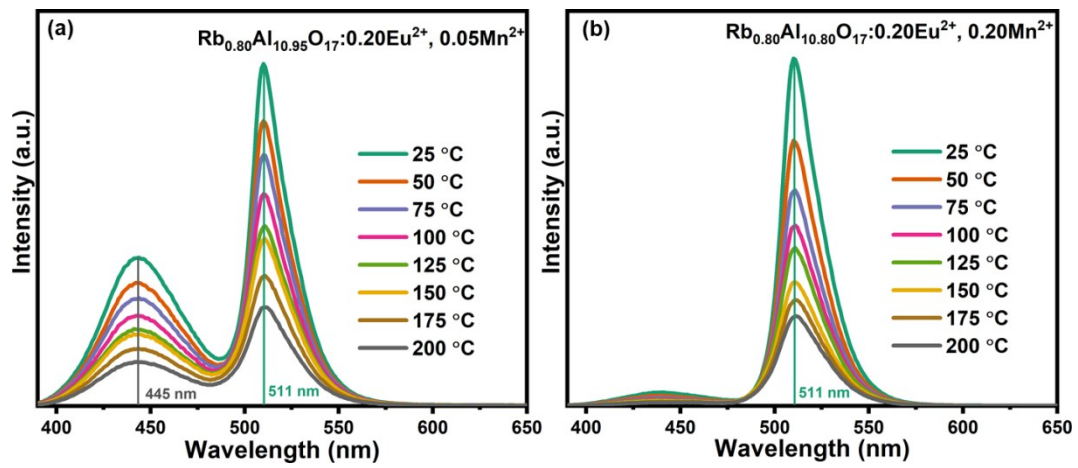

Figure S15 Temperature-dependent emission intensity of  $\text{Rb}_{0.80}\text{Al}_{10.95}\text{O}:\text{0.20Eu}^{2+}, \text{0.05Mn}^{2+}$  and  $\text{Rb}_{0.80}\text{Al}_{10.80}\text{O}:\text{0.20Eu}^{2+}, \text{0.20Mn}^{2+}$  during the heating process under a 345 nm UV light source.

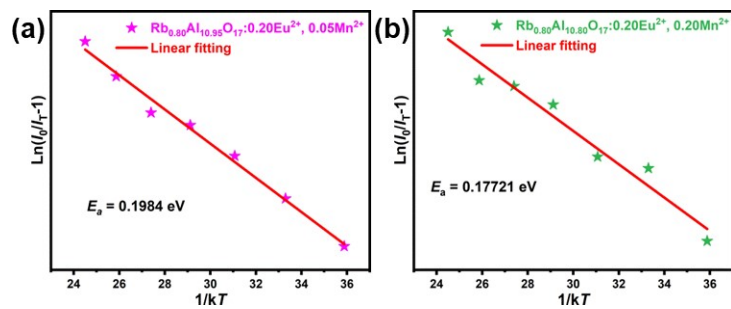

Figure S16 The activation energy ( $E_a$ ) of  $\text{Rb}_{0.80}\text{Al}_{10.95}\text{O}_{17}:\text{0.20Eu}^{2+}, \text{0.05Mn}^{2+}$  and  $\text{Rb}_{0.80}\text{Al}_{10.80}\text{O}_{17}:\text{0.20Eu}^{2+}, \text{0.20Mn}^{2+}$ .
